# Supplementary material for: A robust 3D In–MOF with an imidazole acid ligand as a fluorescent sensor for sensitive and selective detection of Fe3+ ions
Source: Royal Society of Chemistry journal article supplement (doi:10.1039/d0nj03793a), 2020-01-01
Supplement: d0nj03793a6.pdf [file d0nj03793a6.pdf]

## Supporting Information

### **A robust 3D In-MOF with imidazole acid ligand as fluorescent sensor for sensitive and selective detection of Fe<sup>3+</sup> ions**

Peipei Cen,<sup>\*a#</sup> Chen Liang,<sup>b#</sup> Lijuan Duan,<sup>b</sup> Meilin Wang,<sup>a</sup> Danian Tian,<sup>a</sup> and Xiangyu Liu<sup>\*b c</sup>

<sup>a</sup> College of Public Health and Management, Ningxia Medical University, Yinchuan 750021, China

<sup>b</sup> State Key Laboratory of High-efficiency Utilization of Coal and Green Chemical Engineering, National Demonstration Center for Experimental Chemistry Education, College of Chemistry and Chemical Engineering, Ningxia University, Yinchuan 750021, China

<sup>c</sup> State Key Laboratory of Coordination Chemistry, Nanjing University, Nanjing, 210023, China

# These authors contributed equally to this work.

**\*Corresponding author**

**Dr. Peipei Cen**

**E-mail: 13895400691@163.com**

**Dr. Xiangyu Liu**

**E-mail: xiangyuliu432@126.com**

## Contents

**Fig. S1** IR spectra of **1**.

**Fig. S2** PXRD patterns for **1**.

**Fig. S3** TG curves of **1**.

**Fig. S4** Solid-state fluorescence emissions recorded at room temperature for free ligand and **1**.

**Fig. S5** Solid state quantum yield determination result of **1** at ambient condition.

**Fig. S6** PXRD patterns of **1** treated by the  $\text{Fe}^{3+}$  aqueous solution.

**Table S1.** Selected bond lengths [ $\text{\AA}$ ] and bond angles [ $^\circ$ ] for **1**.

**Table S2.** Selected hydrogen bond lengths [ $\text{\AA}$ ] and bond angles [ $^\circ$ ] for **1**.

**Table S3.** Comparison of detection capacity of **1** towards Fe ion with other materials.

**References**

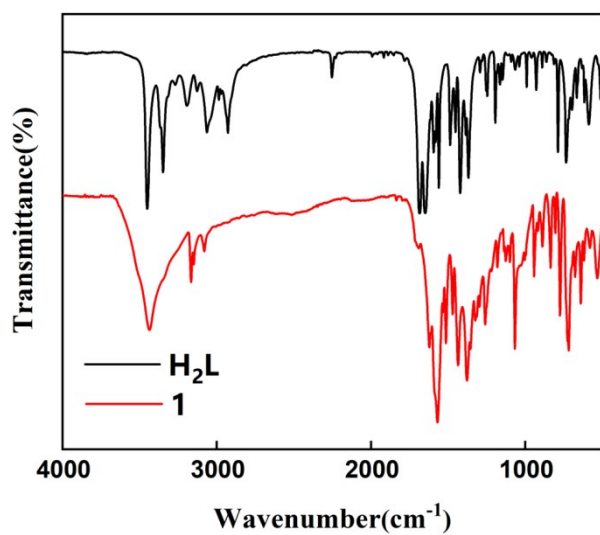

Fig. S1 IR spectra of 1.

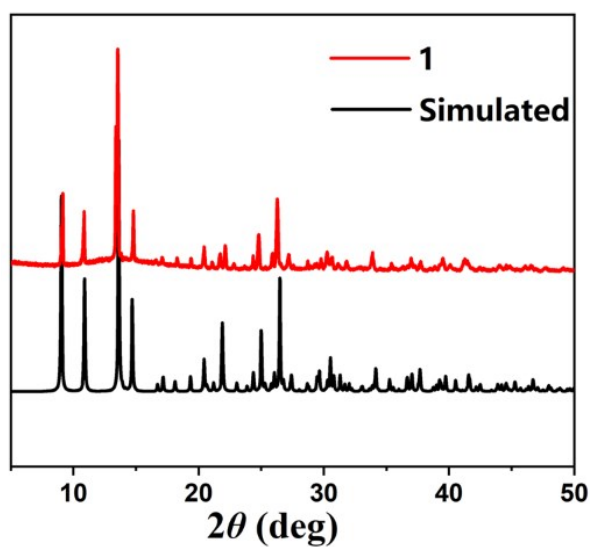

Fig. S2 PXRD pattern of 1.

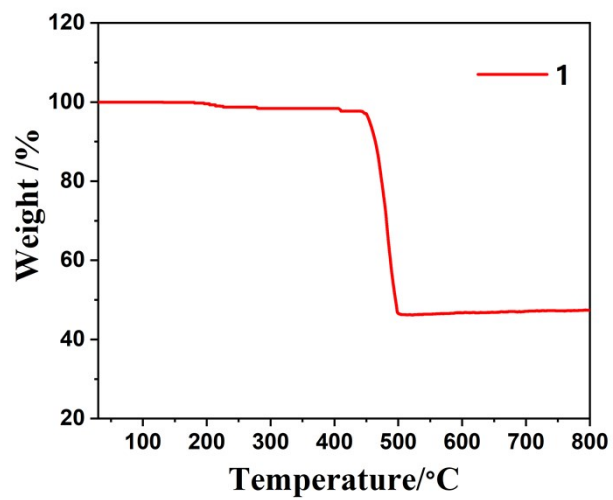

Fig. S3 TG curves of 1.

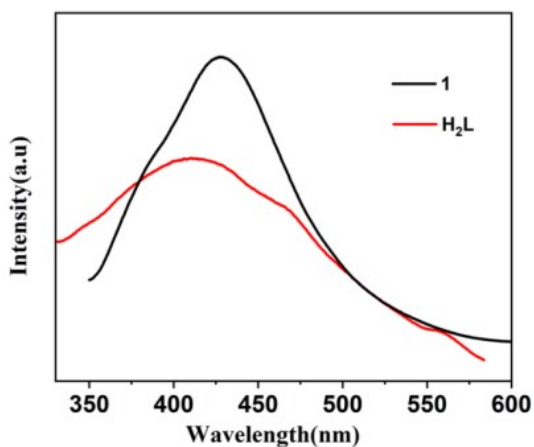

Fig. S4 Solid-state fluorescence emissions recorded at room temperature for free ligand and **1**.

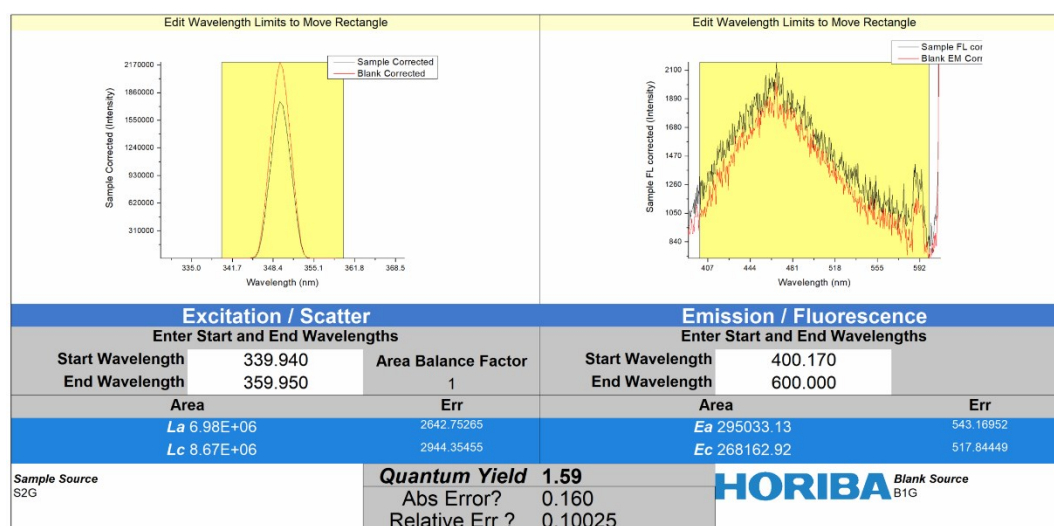

Fig. S5 Solid state quantum yield determination result of **1** at ambient condition.

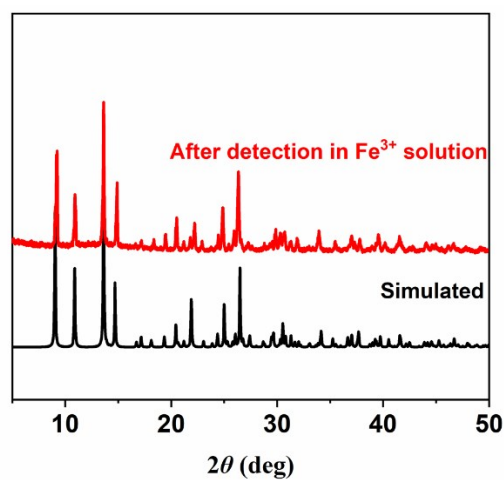

Fig. S6 PXRD patterns of **1** treated by the  $\text{Fe}^{3+}$  aqueous solution.

**Table S1.** Selected bond lengths [Å] and bond angles [°] for **1**.

| Compound <b>1</b>     |            |                       |             |
|-----------------------|------------|-----------------------|-------------|
| In(1)–O(1)            | 2.169(3)   | In(1)–O(5) #3         | 2.098(3)    |
| In(1)–O(3)#1          | 2.175(3)   | In(1)–O(5)            | 2.101(3)    |
| In(1)–O(4) #2         | 2.198(3)   | In(1)–N(2) #4         | 2.238(3)    |
| O(1)–In(1)–O(3) #1    | 99.71(10)  | C(9)–N(2)–C(11)       | 105.4(3)    |
| O(1)–In(1)–O(4) #2    | 96.80(10)  | C(11)–N(2)–In(1) #7   | 128.8(2)    |
| O(1)–In(1)–N(2) #3    | 178.67(10) | O(5) #4–In(1)–O(5)    | 162.571(18) |
| O(3) #1–In(1)–O(4) #2 | 163.38(10) | O(5)–In(1)–N(2) #3    | 96.47(12)   |
| O(3) #1–In(1)–N(2) #3 | 81.56(10)  | O(5) #4–In(1)–N(2) #3 | 100.77(11)  |
| O(4) #2–In(1)–N(2) #3 | 81.92(11)  | C(7)–O(1)–In(1)       | 127.1(2)    |
| O(5)–In(1)–O(1)       | 83.98(11)  | C(8)–O(3)–In(1) #5    | 129.2(2)    |
| O(5) #4–In(1)–O(1)    | 78.73(10)  | C(8)–O(4)–In(1) #2    | 129.0(2)    |
| O(5)–In(1)–O(3) #1    | 89.10(10)  | In(1) #6–O(5)–In(1)   | 123.67(12)  |
| O(5) #4–In(1)–O(3) #1 | 95.89(10)  | C(9)–N(2)–In(1) #7    | 125.7(3)    |
| O(5)–In(1)–O(4) #2    | 94.57(10)  | O(5) #4–In(1)–O(4) #2 | 85.41(10)   |

Symmetry transformations used to generate equivalent atoms:  
#1 +X,1–Y,1/2+Z; #2 3/2–X,3/2–Y,1–Z; #3 1/2+X,3/2–Y,1/2+Z; #4 3/2–X,–1/2+Y,3/2–Z; #5 +X,1–Y,–1/2+Z; #6 3/2–X,1/2+Y,3/2–Z; #7 –1/2+X,3/2–Y,–1/2+Z

**Table S2.** Selected hydrogen bond lengths [Å] and bond angles [°] for **1**.

| D–H···A            | d(D–H)/Å | d(H···A)/Å | d(D···A)/Å | D–H···A/° |
|--------------------|----------|------------|------------|-----------|
| O(5)–H(5)···O(2)   | 0.86     | 1.97       | 2.777(4)   | 156.3     |
| O(6)–H(6A)···O(2)  | 0.85     | 1.95       | 2.781(5)   | 165.7     |
| O(7)–H(7)···O(2)#1 | 0.85     | 1.84       | 2.686(16)  | 172.4     |

Symmetry transformations used to generate equivalent atoms:  
#1 +X,1–Y,–1/2+Z

**Table S3.** Comparison of detection capacity of **1** towards Fe ion with other materials.

| Materials                                                                                                                 | Solvent | Detection Limit           | Ref.      |
|---------------------------------------------------------------------------------------------------------------------------|---------|---------------------------|-----------|
| [Tb(tftba)1.5(phen)(H <sub>2</sub> O)] <sub>n</sub>                                                                       | Water   | 1.27 × 10 <sup>-5</sup> M | 1         |
| [Tb(HL) <sub>1.5</sub> (H <sub>2</sub> O)(DMF)]·2H <sub>2</sub> O                                                         | aqueous | 2.0 × 10 <sup>-5</sup> M  | 2         |
| [In(L)(μ <sub>2</sub> -OH)]·0.5H <sub>2</sub> O                                                                           | Water   | 2.2 × 10 <sup>-5</sup> M  | This work |
| Eu <sup>3+</sup> @MIL-53-COOH (Al)                                                                                        | Water   | 5.0 × 10 <sup>-5</sup> M  | 3         |
| BUT-15                                                                                                                    | Water   | 8.0 × 10 <sup>-5</sup> M  | 4         |
| [Eu(bpda) <sub>1.5</sub> ]·H <sub>2</sub> O <sub>n</sub>                                                                  | Water   | 9.0 × 10 <sup>-5</sup> M  | 5         |
| {[Cd <sub>3</sub> (HL) <sub>2</sub> (H <sub>2</sub> O) <sub>3</sub> ]·3H <sub>2</sub> O·2CH <sub>3</sub> CN} <sub>n</sub> | Water   | 9.06 × 10 <sup>-5</sup> M | 6         |
| [Zn <sub>5</sub> (hfipbb) <sub>4</sub> (trz) <sub>2</sub> (H <sub>2</sub> O) <sub>2</sub> ] <sub>n</sub>                  | Water   | 2.0 × 10 <sup>-4</sup> M  | 7         |
| [(CH <sub>3</sub> ) <sub>2</sub> NH <sub>2</sub> ]·[Tb(bptc)]                                                             | Ethanol | 1.8 × 10 <sup>-4</sup> M  | 8         |

|                                                                                          |         |                          |    |
|------------------------------------------------------------------------------------------|---------|--------------------------|----|
| EuL <sub>3</sub>                                                                         | Ethanol | 10 <sup>-4</sup> M       | 9  |
| Eu(acac) <sub>3</sub> ·Zn(C <sub>15</sub> H <sub>12</sub> NO <sub>2</sub> ) <sub>2</sub> | DMF     | 5.0 × 10 <sup>-3</sup> M | 10 |

## References

- (1) H.-H. Yu, J.-Q. Chi, Z.-M. Su, X. Li, J. Sun, C. Zhou and Q. Liu, *CrystEngComm.*, 2020, **22**, 3638-3643.
- (2) F. Zhao, X.-Y. Guo, Z.-P. Dong, Z.-L. Liu and Y.-Q. Wang, *Dalton Trans.*, 2020, **47**, 8972- 8982.
- (3) Y. Zhou, H.-H. Chen and B. Yan, *J. Mater. Chem. A.*, 2014, **2**, 13691-13697.
- (4) H.-J. Zhang, R.-Q. Fan, W. Chen, J.-Z. Fan, Y. W.-Dong, Y. Song, X.-Du, P. Wang and Y. L. Yang, *Cryst. Growth Des.*, 2016, **16**, 5429-5440.
- (5) J. Wang, J.-R. Wang, Y. Li, M. Jiang, L.-W. Zhang and P.-Y. Wu, *New J. Chem.*, 2016, **40**, 8600-8606.
- (6) W.-Q. Tong, W.-N. Liu, J.-G. Cheng, P.-F. Zhang, G.-P. Li, L. Hou and Y. -Y. Wang, *Dalton Trans.*, 2018, **47**, 9466-9473.
- (7) B.-L. Hou, D. Tian, J. Liu, L.-Z. Dong, S. -L. Li, D.-S. Li and Y.-Q. Lan, *Inorg. Chem.*, 2016, **55**, 10580-10586.
- (8) X.-L. Zhao, D. Tian, Q. Gao, H.-W. Sun, J. Xu and X.-H. Bu, *Dalton Trans.*, 2016, **45**, 1040-1046.
- (9) M. Zheng, H. Tan, Z. Xie, L. Zhang, X. Jing and Z. Sun, *ACS Appl. Mater. Interfaces.*, 2013, **5**, 1078-1083.
- (10) Q. Tang, S. Liu, Y. Liu, J. Miao, S. Li, L. Zhang, Z. Shi and Z. Zheng, *Inorg. Chem.*, 2013, **52**, 2799-2801.
