# Supplementary figures and images for: A robust 3D In–MOF with an imidazole acid ligand as a fluorescent sensor for sensitive and selective detection of Fe3+ ions
Source: Royal Society of Chemistry journal article supplement (doi:10.1039/d0nj03793a), 2020-01-01

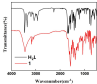

Supplement: d0nj03793a1.pdf [file d0nj03793a1.pdf]

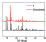

Supplement: d0nj03793a2.pdf [file d0nj03793a2.pdf]

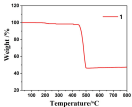

Supplement: d0nj03793a3.pdf [file d0nj03793a3.pdf]

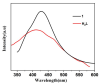

Supplement: d0nj03793a4.pdf [file d0nj03793a4.pdf]

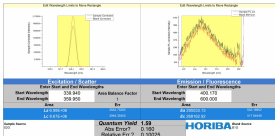

Supplement: d0nj03793a5.pdf [file d0nj03793a5.pdf]
